# Supplementary material for: Complex modulation of cytokine-induced α-synuclein aggregation by glypican-1-derived heparan sulfate in neural cells
Source: PubMed Central journal article supplement (PMC8970428; doi:10.1093/glycob/cwab126), 2021-12-07
Supplement: supplementary_material_cwab126.pdf [file supplementary_material_cwab126.pdf]

# Supplementary material

## **Complex modulation of cytokine-induced $\alpha$ -synuclein aggregation by glypican-1-derived heparan sulfate in neural cells**

*Key words:* Glypican-1/ Heparan sulfate/ Nitric oxide/ Parkinson's disease/  $\alpha$ -Synuclein

*Running head:* Modulation of  $\alpha$ -synuclein aggregation by heparan sulfate

Fang Cheng, Lars-Åke Fransson and Katrin Mani\*

*Department of Experimental Medical Science, Division of Neuroscience, Glycobiology Group, Lund University, Biomedical Center A13, SE-221 84 Lund, Sweden*

\*To whom correspondence should be addressed: Tel: +46-46-222-4044; e-mail:

[katrin.mani@med.lu.se](mailto:katrin.mani@med.lu.se)

SH-SY5Y

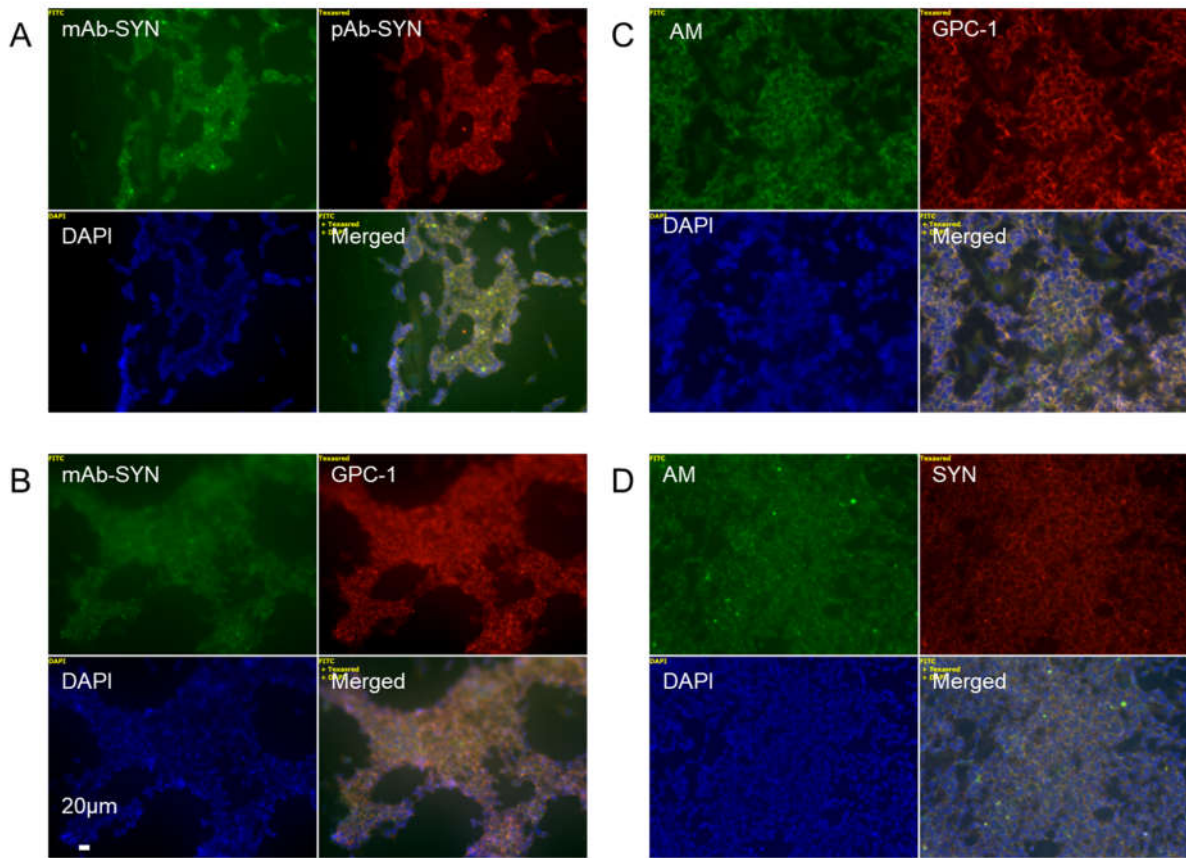

Fig.S1

**Fig. S1.**  $\alpha$ -Synuclein (SYN) co-localizes with glypican-1 (Gpc-1) and anhydromannose-containing heparan sulfate (HS-anMan) in human neuroblastoma SH-SY5Y cells. Immunofluorescence images at low magnification of cell cultures grown to near confluence in regular medium. Staining was performed with mAb SYN (green), pAb SYN (red), pAb GPC-1 (red), mAb AM (for HS-anMan) and DAPI (for nuclei, blue). Exposure time was the same in all cases. Bar, 20  $\mu$ m.

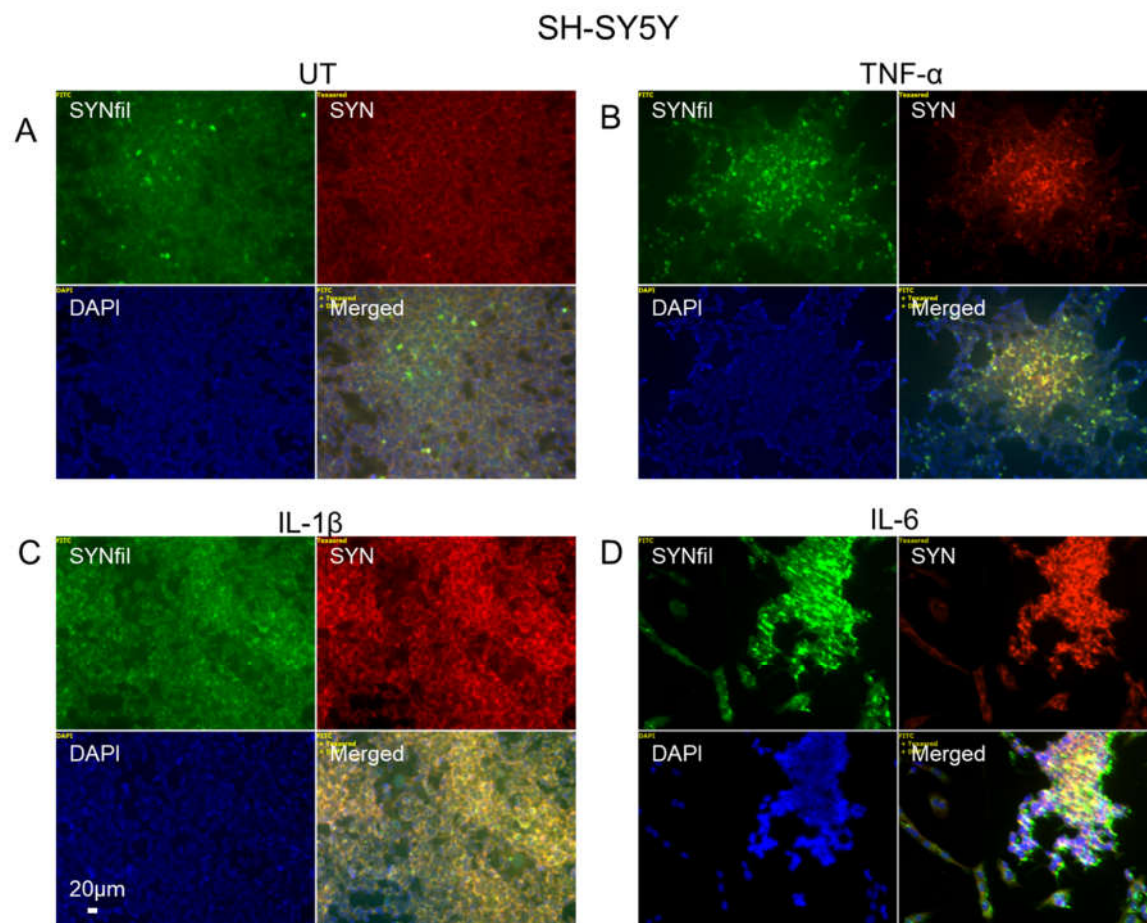

Fig.S2

**Fig. S2.** The cytokines TNF- $\alpha$ , IL-1 $\beta$  and IL-6 induce increased co-localization of  $\alpha$ -synuclein filaments (SYNfil) and  $\alpha$ -synuclein (SYN) in SH-SY5Y cells. Immunofluorescence images of confluent cultures of SH-SY5Y cells at low magnification. Cells were grown to confluence in regular medium (A, UT = untreated) or in medium containing 100 pg/ml TNF- $\alpha$  (B), 50 ng/ml IL-1 $\beta$  (C) or 100 ng/ml IL-6 (D). Staining was performed with mAb SYNfil (green), pAb SYN (red) and DAPI (for nuclei, blue). Exposure time was the same in all cases. Bar, 20  $\mu$ m.

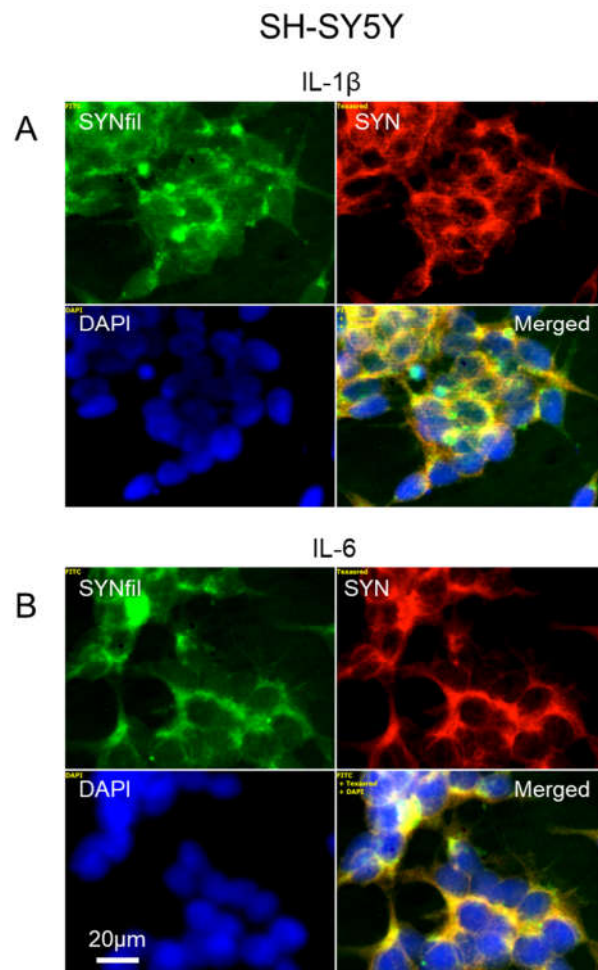

Fig.S3

**Fig. S3.** Clustered and diffuse co-localization of  $\alpha$ -synuclein filaments (SYNfil) with  $\alpha$ -synuclein (SYN) in SH-SY5Y cells upon growth in the presence of IL-1 $\beta$  (A) or IL-6 (B). Representative immunofluorescence images of confluent cultures of SH-SY5Y cells which were grown to confluence in medium containing 50 ng/ml IL-1 $\beta$  or 100 ng/ml IL-6. Staining was performed with mAb SYNfil (green), pAb SYN (red) and DAPI (for nuclei, blue). Exposure time was the same in both cases. Bar, 20  $\mu$ m.

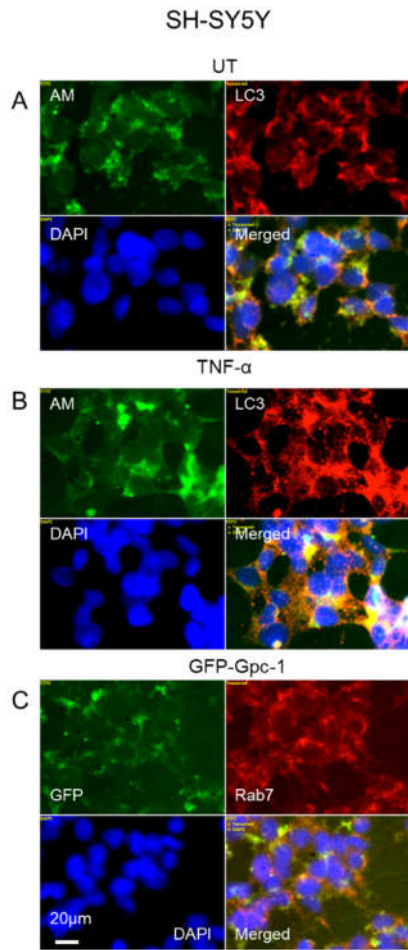

Fig.S4

**Fig. S4.** Tumor necrosis factor- $\alpha$  (TNF- $\alpha$ ) induces slightly increased staining for anhydromannose-containing HS (HS-anMan) but no increased co-localization with the autophagosome marker LC3 in SH-SY5Y cells (A, B) and green fluorescent protein-tagged glypican-1 (GFP-Gpc-1) appears in Rab7-positive late endosomes (C). Representative immunofluorescence images of confluent cultures of SH-SY5Y cells which were grown to confluence in regular medium (A, UT=untreated) or in medium containing 100 pg/ml TNF- $\alpha$  (B) or transfected with a vector encoding GFP-tagged Gpc-1 (C). Staining was performed with mAb AM (for HS-anMan, green), a pAb against LC3 (autophagosome marker, red), and DAPI (for nuclei, blue) in A and B, and with a pAb against Rab7 (red) and DAPI (for nuclei, blue) in C. In C, GFP-Gpc-1 is visualized in the green channel. Exposure time was the same in all cases. Bar, 20  $\mu$ m.





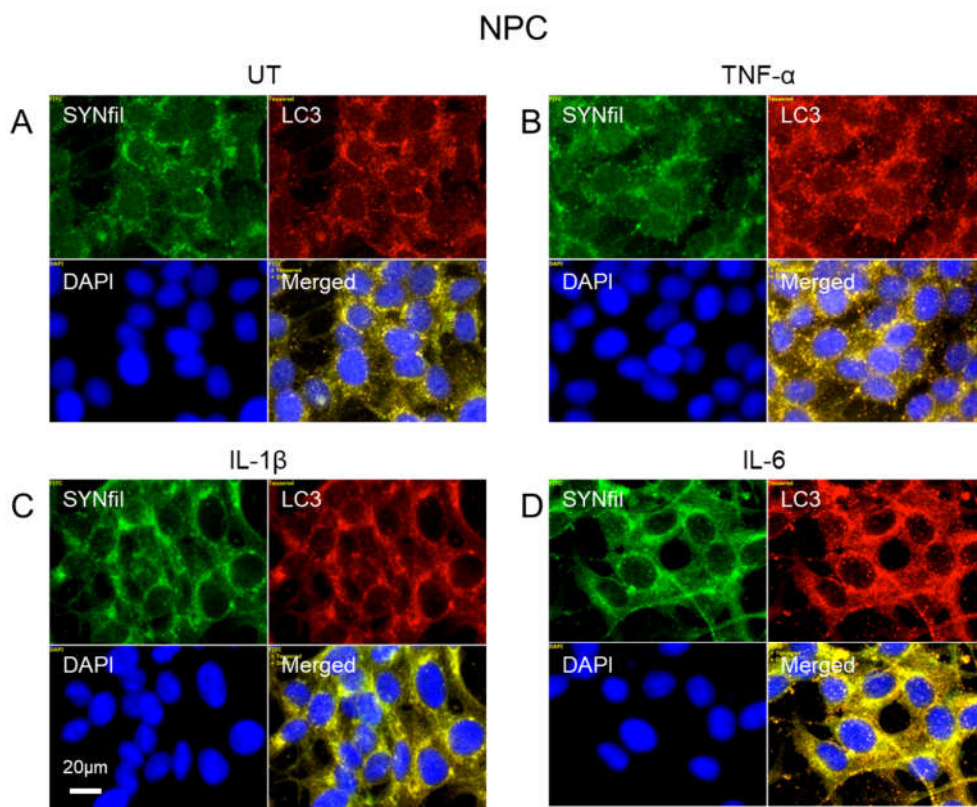

Fig. S6

**Fig. S6.** Effect of the cytokines on SYN aggregation and association with autophagosomes. Representative immunofluorescence images of confluent cultures of NPC grown to confluence in regular medium (A, UT=untreated), in medium containing 100 pg/ml TNF- $\alpha$  (B) or 50 ng/ml IL-1 $\beta$  (C) or 100 ng/ml IL-6 (D). Staining was performed with mAb SYNfil (green), pAb LC3 (red) and DAPI (for nuclei, blue). Exposure time was the same in all cases. Bar, 20  $\mu$ M.
